# Supplementary material for: Oncogenic c-terminal cyclin D1 (CCND1) mutations are enriched in endometrioid endometrial adenocarcinomas
Source: PubMed Central journal article supplement (PMC6029777; doi:10.1371/journal.pone.0199688), 2018-07-03
Supplement: pone.0199688.s002.pdf [file pone.0199688.s002.pdf]

## Supplementary Table 2

| Sample ID | Cancer Type          | Protein Change | Functional Impact | Mutation Type |
|-----------|----------------------|----------------|-------------------|---------------|
| M027      | Mantle Cell Lymphoma | S41T           | Unknown           | Missense      |
| M027      | Mantle Cell Lymphoma | V42E           | Unknown           | Missense      |
| M004      | Mantle Cell Lymphoma | Y44*           | Likely oncogenic  | Nonsense      |
| M003      | Mantle Cell Lymphoma | Y44C           | Likely oncogenic  | Missense      |
| M015      | Mantle Cell Lymphoma | Y44D           | Likely oncogenic  | Missense      |
| M009      | Mantle Cell Lymphoma | Y44D           | Likely oncogenic  | Missense      |
| M004      | Mantle Cell Lymphoma | Y44H           | Likely oncogenic  | Missense      |
| M011      | Mantle Cell Lymphoma | Y44S           | Likely oncogenic  | Missense      |
| M021      | Mantle Cell Lymphoma | K46E           | Unknown           | Missense      |
| M018      | Mantle Cell Lymphoma | C47S           | Likely oncogenic  | Missense      |
| M002      | Mantle Cell Lymphoma | C47S           | Likely oncogenic  | Missense      |
| M022      | Mantle Cell Lymphoma | V290G          | Unknown           | Missense      |

**Supplemental table 2.** *CCND1* mutations in the mantle cell lymphoma IDIBIPS study cohort. IF del= in frame deletion; FS Ins=frame shift insertion; \*= truncating mutations. Note: 2 tumors had more than mutation.
