# Supplementary material for: Oncogenic c-terminal cyclin D1 (CCND1) mutations are enriched in endometrioid endometrial adenocarcinomas
Source: PubMed Central journal article supplement (PMC6029777; doi:10.1371/journal.pone.0199688), 2018-07-03
Supplement: pone.0199688.s003.pdf [file pone.0199688.s003.pdf]

## Supplementary Figure 1

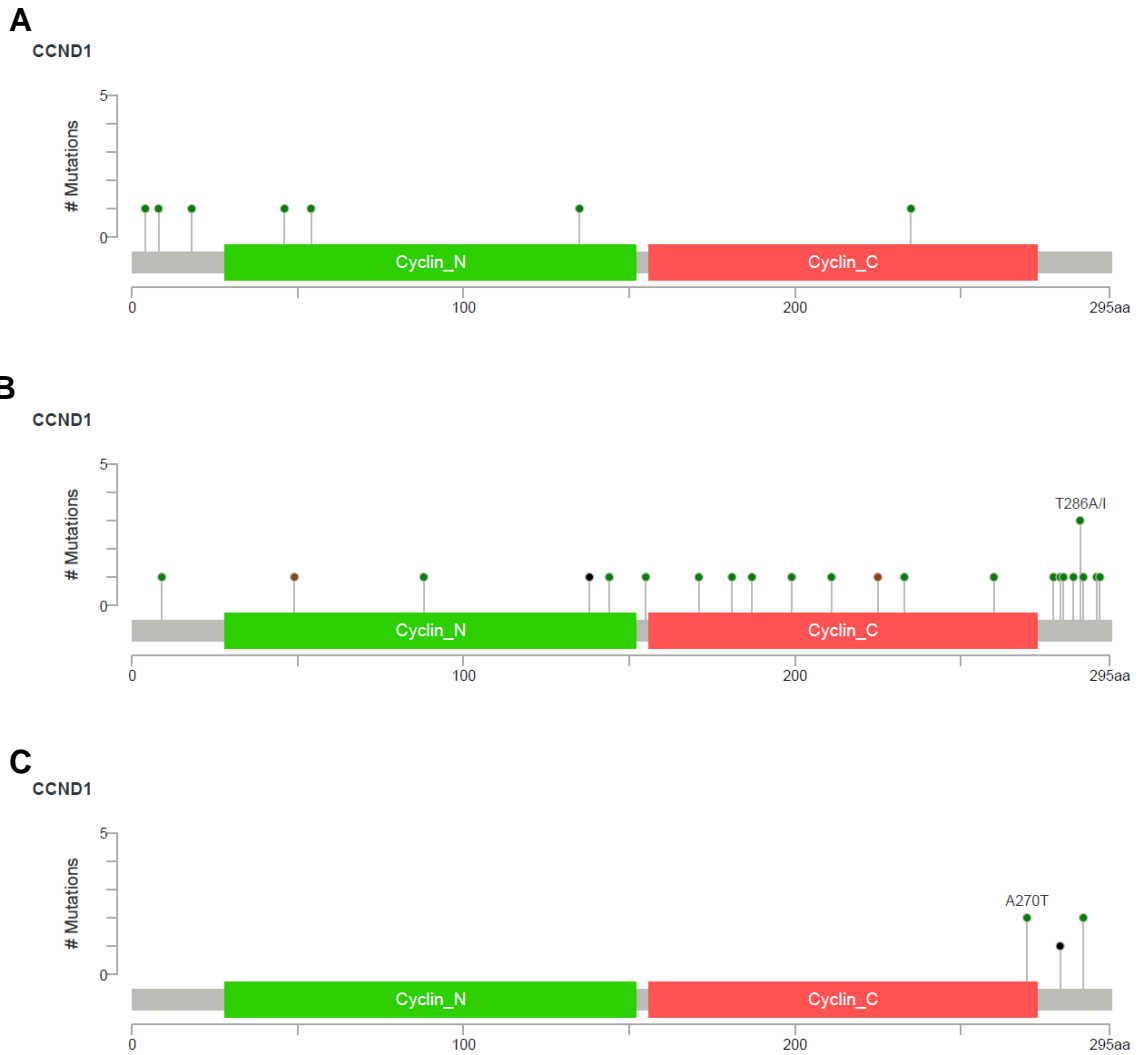

**Supplemental Figure 1.** Diagrams of *CCND1* mutations in multiple myeloma (A), colorectal adenocarcinoma (B) and in cutaneous melanoma (C).
