# Supplementary material for: Oncogenic c-terminal cyclin D1 (CCND1) mutations are enriched in endometrioid endometrial adenocarcinomas
Source: PubMed Central journal article supplement (PMC6029777; doi:10.1371/journal.pone.0199688), 2018-07-03
Supplement: pone.0199688.s004.pdf [file pone.0199688.s004.pdf]

Supplementary Figure 2

A

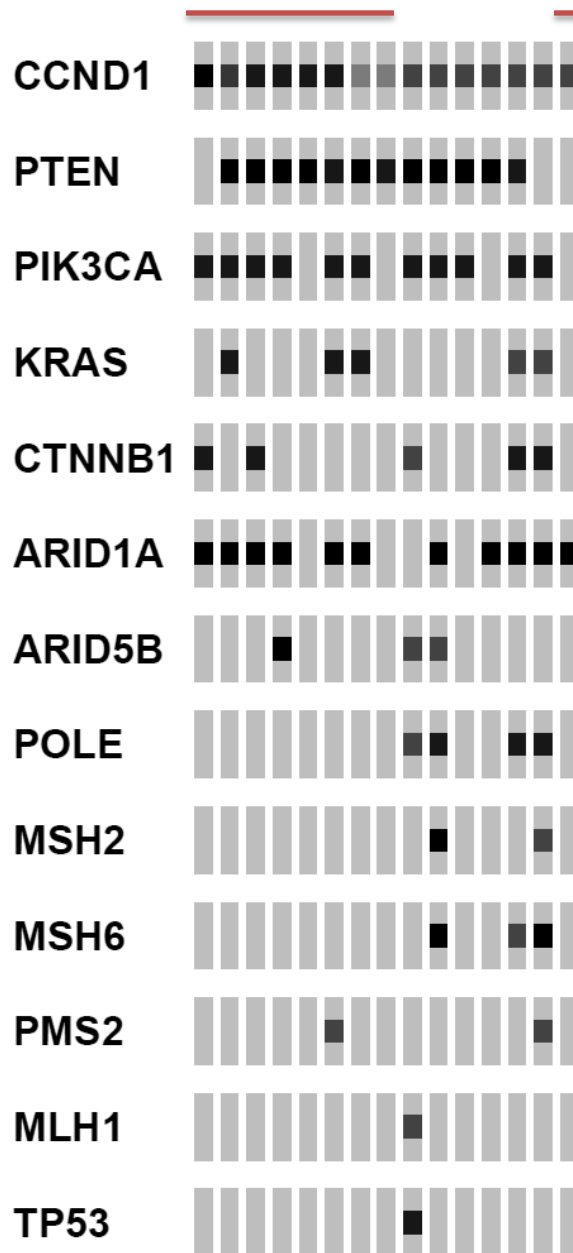

**Supplemental Figure 2.** Diagram of co-occurring mutations of genes frequently implicated in endometrial cancer in the TCGA cohort of endometrial carcinoma cases exhibiting *CCND1* mutations. Square denotes presence of gene mutation. Red bar denotes presence of C-terminal *CCND1* mutation.
